# Supplementary material for: Age-Related Changes in Relaxation Times, Proton Density, Myelin, and Tissue Volumes in Adult Brain Analyzed by 2-Dimensional Quantitative Synthetic Magnetic Resonance Imaging
Source: PubMed Central journal article supplement — Invest Radiol. 2020 Aug 27;56(3):163–72. doi: 10.1097/RLI.0000000000000720 (PMC7864648; doi:10.1097/rli.0000000000000720), 2020-08-27
Supplement: rli-56-163-s002.pdf [file rli-56-163-s002.pdf]

**Supplemental Digital Content 1.** The equations used to plot the curves for T1 values (ms)

|                            | T1                                                           | SD of 1st coefficient | SD of 2nd coefficient | SD of 3rd coefficient | Adjusted R <sup>2</sup> (R <sup>2</sup> ) |
|----------------------------|--------------------------------------------------------------|-----------------------|-----------------------|-----------------------|-------------------------------------------|
| Cortical GM                |                                                              |                       |                       |                       |                                           |
| Frontal GM                 | $0.231 \times \text{age}^2 - 20.6 \times \text{age} + 1650$  | 0.029                 | 3.1                   | 73                    | 0.50 (0.51)                               |
| Parietal GM                | $0.235 \times \text{age}^2 - 20.6 \times \text{age} + 1650$  | 0.038                 | 3.5                   | 85                    | 0.46 (0.47)                               |
| Temporal GM                | $0.236 \times \text{age}^2 - 20.3 \times \text{age} + 1690$  | 0.033                 | 3.5                   | 83                    | 0.49 (0.50)                               |
| Occipital GM               | $0.221 \times \text{age}^2 - 19.0 \times \text{age} + 1620$  | 0.035                 | 3.7                   | 88                    | 0.43 (0.44)                               |
| Insula                     | $0.315 \times \text{age}^2 - 28.1 \times \text{age} + 1810$  | 0.043                 | 4.5                   | 109                   | 0.45 (0.46)                               |
| WM                         |                                                              |                       |                       |                       |                                           |
| Frontal WM                 | $0.0663 \times \text{age}^2 - 4.87 \times \text{age} + 818$  | 0.0093                | 0.98                  | 23                    | 0.67 (0.68)                               |
| Parietal WM                | $0.0514 \times \text{age}^2 - 3.75 \times \text{age} + 801$  | 0.0084                | 0.88                  | 21                    | 0.61 (0.62)                               |
| Temporal WM                | $0.0704 \times \text{age}^2 - 5.50 \times \text{age} + 828$  | 0.0098                | 1.03                  | 25                    | 0.62 (0.63)                               |
| Occipital WM               | $0.0399 \times \text{age}^2 - 2.90 \times \text{age} + 818$  | 0.0080                | 0.84                  | 20                    | 0.51 (0.52)                               |
| Genu                       | $0.0504 \times \text{age}^2 - 3.58 \times \text{age} + 703$  | 0.0082                | 0.86                  | 21                    | 0.64 (0.65)                               |
| Splenium                   | $0.0371 \times \text{age}^2 - 2.81 \times \text{age} + 726$  | 0.0080                | 0.83                  | 20                    | 0.44 (0.45)                               |
| Internal Capsule           | $0.0591 \times \text{age}^2 - 4.43 \times \text{age} + 800$  | 0.0087                | 0.91                  | 22                    | 0.64 (0.64)                               |
| Middle Cerebellar Peduncle | $0.0186 \times \text{age}^2 - 1.24 \times \text{age} + 826$  | 0.0091                | 0.96                  | 23                    | 0.18 (0.20)                               |
| Subcortical GM             |                                                              |                       |                       |                       |                                           |
| Caudate                    | $0.100 \times \text{age}^2 - 9.32 \times \text{age} + 1250$  | 0.013                 | 1.33                  | 32                    | 0.44 (0.45)                               |
| Putamen                    | $0.0587 \times \text{age}^2 - 5.03 \times \text{age} + 1100$ | 0.0115                | 1.21                  | 29                    | 0.34 (0.35)                               |
| Thalamus                   | $0.0446 \times \text{age}^2 - 3.52 \times \text{age} + 979$  | 0.0100                | 1.04                  | 25                    | 0.37 (0.38)                               |

Abbreviations: GM, gray matter; SD; standard deviation; WM, white matter. Note—The 1st coefficient is for age<sup>2</sup>; the 2nd coefficient is for age; and the 3rd coefficient is the Y-intercept. The adjusted R<sup>2</sup> is a modified version of R<sup>2</sup> that has been adjusted for the number of independent variables in the model.

**Supplemental Digital Content 2.** The equations used to plot the curves for T2 values (ms)

|                            | T2                                                            | SD of 1st coefficient | SD of 2nd coefficient | SD of 3rd coefficient | Adjusted R <sup>2</sup> (R <sup>2</sup> ) |
|----------------------------|---------------------------------------------------------------|-----------------------|-----------------------|-----------------------|-------------------------------------------|
| Cortical GM                |                                                               |                       |                       |                       |                                           |
| Frontal GM                 | $0.0122 \times \text{age}^2 - 1.11 \times \text{age} + 96.8$  | 0.0016                | 0.17                  | 4.0                   | 0.45 (0.46)                               |
| Parietal GM                | $0.0131 \times \text{age}^2 - 1.17 \times \text{age} + 95.9$  | 0.0018                | 0.19                  | 4.6                   | 0.46 (0.47)                               |
| Temporal GM                | $0.0128 \times \text{age}^2 - 1.16 \times \text{age} + 100$   | 0.0017                | 0.18                  | 4                     | 0.45 (0.46)                               |
| Occipital GM               | $0.0124 \times \text{age}^2 - 1.10 \times \text{age} + 92.5$  | 0.0018                | 0.19                  | 4.5                   | 0.44 (0.45)                               |
| Insula                     | $0.0263 \times \text{age}^2 - 2.42 \times \text{age} + 125$   | 0.0041                | 0.43                  | 10                    | 0.35 (0.36)                               |
| WM                         |                                                               |                       |                       |                       |                                           |
| Frontal WM                 | $0.0034 \times \text{age}^2 - 2.53 \times \text{age} + 68.9$  | 0.0006                | 0.06                  | 1.4                   | 0.58 (0.59)                               |
| Parietal WM                | $0.0024 \times \text{age}^2 - 0.185 \times \text{age} + 70.2$ | 0.0005                | 0.053                 | 1.3                   | 0.42 (0.43)                               |
| Temporal WM                | $0.0039 \times \text{age}^2 - 0.333 \times \text{age} + 70.1$ | 0.0006                | 0.059                 | 1.4                   | 0.49 (0.50)                               |
| Occipital WM               | $0.0016 \times \text{age}^2 - 0.134 \times \text{age} + 70.5$ | 0.0005                | 0.048                 | 1.1                   | 0.20 (0.21)                               |
| Genu                       | $0.0032 \times \text{age}^2 - 0.223 \times \text{age} + 63.0$ | 0.0006                | 0.061                 | 1.5                   | 0.61 (0.61)                               |
| Splenium                   | $0.0016 \times \text{age}^2 - 0.118 \times \text{age} + 66.6$ | 0.0005                | 0.053                 | 1.3                   | 0.27 (0.28)                               |
| Internal Capsule           | $0.0033 \times \text{age}^2 - 0.275 \times \text{age} + 67.7$ | 0.0005                | 0.057                 | 1.4                   | 0.47 (0.48)                               |
| Middle Cerebellar Peduncle | $0.0010 \times \text{age}^2 - 0.076 \times \text{age} + 70.4$ | 0.0005                | 0.049                 | 1.2                   | 0.16 (0.18)                               |
| Subcortical GM             |                                                               |                       |                       |                       |                                           |
| Caudate                    | $0.0070 \times \text{age}^2 - 0.629 \times \text{age} + 76.6$ | 0.0010                | 0.106                 | 2.5                   | 0.42 (0.43)                               |
| Putamen                    | $0.0043 \times \text{age}^2 - 0.446 \times \text{age} + 68.1$ | 0.0009                | 0.097                 | 2.3                   | 0.15 (0.16)                               |
| Thalamus                   | $0.0037 \times \text{age}^2 - 0.257 \times \text{age} + 66.4$ | 0.0006                | 0.059                 | 1.4                   | 0.69 (0.70)                               |

Abbreviations: GM, gray matter; SD; standard deviation; WM, white matter. Note—The 1st coefficient is for age<sup>2</sup>; the 2nd coefficient is for age; and the 3rd coefficient is the Y-intercept. The adjusted R<sup>2</sup> is a modified version of R<sup>2</sup> that has been adjusted for the number of independent variables in the model.

**Supplemental Digital Content 3.** The equations used to plot the curves for PD values (pu)

|                            | PD                                                             | SD of 1st coefficient | SD of 2nd coefficient | SD of 3rd coefficient | Adjusted R <sup>2</sup> (R <sup>2</sup> ) |
|----------------------------|----------------------------------------------------------------|-----------------------|-----------------------|-----------------------|-------------------------------------------|
| Cortical GM                |                                                                |                       |                       |                       |                                           |
| Frontal GM                 | $0.0023 \times \text{age}^2 - 0.256 \times \text{age} + 88.0$  | 0.0003                | 0.032                 | 0.8                   | 0.38 (0.39)                               |
| Parietal GM                | $0.0013 \times \text{age}^2 - 0.155 \times \text{age} + 86.7$  | 0.0003                | 0.031                 | 0.8                   | 0.28 (0.29)                               |
| Temporal GM                | $0.0013 \times \text{age}^2 - 0.135 \times \text{age} + 87.4$  | 0.0003                | 0.027                 | 0.7                   | 0.17 (0.18)                               |
| Occipital GM               | $0.00073 \times \text{age}^2 - 0.093 \times \text{age} + 85.3$ | 0.0003                | 0.033                 | 0.8                   | 0.12 (0.45)                               |
| Insula                     | $0.00056 \times \text{age}^2 - 0.057 \times \text{age} + 84.4$ | 0.0003                | 0.030                 | 0.7                   | 0.017 (0.034)                             |
| WM                         |                                                                |                       |                       |                       |                                           |
| Frontal WM                 | $0.0022 \times \text{age}^2 - 0.144 \times \text{age} + 66.4$  | 0.0004                | 0.042                 | 1.0                   | 0.63 (0.64)                               |
| Parietal WM                | $0.0016 \times \text{age}^2 - 0.104 \times \text{age} + 65.7$  | 0.0004                | 0.038                 | 0.9                   | 0.54 (0.55)                               |
| Temporal WM                | $0.0023 \times \text{age}^2 - 0.166 \times \text{age} + 66.8$  | 0.0004                | 0.045                 | 1.1                   | 0.55 (0.56)                               |
| Occipital WM               | $0.0015 \times \text{age}^2 - 0.102 \times \text{age} + 66.3$  | 0.0003                | 0.035                 | 0.8                   | 0.49 (0.50)                               |
| Genu                       | $0.0017 \times \text{age}^2 - 0.115 \times \text{age} + 61.4$  | 0.0004                | 0.049                 | 1.2                   | 0.43 (0.44)                               |
| Splenium                   | $0.0013 \times \text{age}^2 - 0.107 \times \text{age} + 62.5$  | 0.0004                | 0.044                 | 1.1                   | 0.22 (0.23)                               |
| Internal Capsule           | $0.0015 \times \text{age}^2 - 0.108 \times \text{age} + 65.2$  | 0.0004                | 0.045                 | 1.1                   | 0.38 (0.39)                               |
| Middle Cerebellar Peduncle | $0.00034 \times \text{age}^2 - 0.028 \times \text{age} + 67.8$ | 0.0004                | 0.044                 | 1.1                   | -0.003 (0.015)                            |
| Subcortical GM             |                                                                |                       |                       |                       |                                           |
| Caudate                    | $0.0022 \times \text{age}^2 - 0.247 \times \text{age} + 85.6$  | 0.0006                | 0.061                 | 1.5                   | 0.137 (0.152)                             |
| Putamen                    | $0.0016 \times \text{age}^2 - 0.154 \times \text{age} + 82.8$  | 0.0005                | 0.050                 | 1.2                   | 0.100 (0.116)                             |
| Thalamus                   | $0.00066 \times \text{age}^2 - 0.065 \times \text{age} + 75.8$ | 0.0004                | 0.045                 | 1.1                   | 0.005 (0.02)                              |

Abbreviations: GM, gray matter; SD; standard deviation; WM, white matter. Note—The 1st coefficient is for age<sup>2</sup>; the 2nd coefficient is for age; and the 3rd coefficient is the Y-intercept. The adjusted R<sup>2</sup> is a modified version of R<sup>2</sup> that has been adjusted for the number of independent variables in the model.

**Supplemental Digital Content 4.** The equations used to plot the curves for MVF values (%)

|                            | MVF                                                             | SD of 1st coefficient | SD of 2nd coefficient | SD of 3rd coefficient | Adjusted R <sup>2</sup> (R <sup>2</sup> ) |
|----------------------------|-----------------------------------------------------------------|-----------------------|-----------------------|-----------------------|-------------------------------------------|
| Cortical GM                |                                                                 |                       |                       |                       |                                           |
| Frontal GM                 | $-0.0031 \times \text{age}^2 + 0.283 \times \text{age} + 2.3$   | 0.0003                | 0.039                 | 0.9                   | 0.49 (0.50)                               |
| Parietal GM                | $-0.0020 \times \text{age}^2 + 0.179 \times \text{age} + 3.5$   | 0.0003                | 0.034                 | 0.8                   | 0.36 (0.37)                               |
| Temporal GM                | $-0.0015 \times \text{age}^2 + 0.118 \times \text{age} + 4.3$   | 0.0003                | 0.003                 | 0.7                   | 0.44 (0.45)                               |
| Occipital GM               | $-0.00048 \times \text{age}^2 + 0.036 \times \text{age} + 6.2$  | 0.0003                | 0.037                 | 0.9                   | 0.057 (0.074)                             |
| Insula                     | $-0.0024 \times \text{age}^2 + 0.195 \times \text{age} + 3.0$   | 0.0003                | 0.032                 | 0.8                   | 0.60 (0.61)                               |
| WM                         |                                                                 |                       |                       |                       |                                           |
| Frontal WM                 | $-0.0032 \times \text{age}^2 + 0.215 \times \text{age} + 29.1$  | 0.0006                | 0.064                 | 1.5                   | 0.63 (0.63)                               |
| Parietal WM                | $-0.0023 \times \text{age}^2 + 0.154 \times \text{age} + 30.2$  | 0.0005                | 0.056                 | 1.4                   | 0.53 (0.54)                               |
| Temporal WM                | $-0.0035 \times \text{age}^2 + 0.253 \times \text{age} + 28.4$  | 0.0006                | 0.066                 | 1.6                   | 0.56 (0.57)                               |
| Occipital WM               | $-0.0022 \times \text{age}^2 + 0.151 \times \text{age} + 29.4$  | 0.0005                | 0.053                 | 1.3                   | 0.48 (0.49)                               |
| Genu                       | $-0.0028 \times \text{age}^2 + 0.187 \times \text{age} + 36.3$  | 0.0007                | 0.073                 | 1.8                   | 0.46 (0.47)                               |
| Splenium                   | $-0.0022 \times \text{age}^2 + 0.175 \times \text{age} + 34.9$  | 0.0006                | 0.066                 | 1.6                   | 0.26 (0.27)                               |
| Internal Capsule           | $-0.0025 \times \text{age}^2 + 0.176 \times \text{age} + 30.8$  | 0.0006                | 0.067                 | 1.6                   | 0.39 (0.40)                               |
| Middle Cerebellar Peduncle | $-0.00038 \times \text{age}^2 + 0.031 \times \text{age} + 27.5$ | 0.0006                | 0.065                 | 1.6                   | -0.008 (0.01)                             |
| Subcortical GM             |                                                                 |                       |                       |                       |                                           |
| Caudate                    | $-0.0030 \times \text{age}^2 + 0.322 \times \text{age} + 3.0$   | 0.0007                | 0.072                 | 1.7                   | 0.14 (0.16)                               |
| Putamen                    | $-0.0018 \times \text{age}^2 + 0.179 \times \text{age} + 6.6$   | 0.0006                | 0.058                 | 1.4                   | 0.07 (0.08)                               |
| Thalamus                   | $-0.0010 \times \text{age}^2 + 0.083 \times \text{age} + 16.2$  | 0.0006                | 0.065                 | 1.6                   | 0.003 (0.05)                              |

Abbreviations: GM, gray matter; SD; standard deviation; WM, white matter. Note—The 1st coefficient is for age<sup>2</sup>; the 2nd coefficient is for age; and the 3rd coefficient is the Y-intercept. The adjusted R<sup>2</sup> is a modified version of R<sup>2</sup> that has been adjusted for the number of independent variables in the model.

**Supplemental Digital Content 5.** The AIC of linear and quadratic approximations for T1, T2, PD, and MVF

|                            | T1     |             | T2     |            | PD     |            | MVF    |              |
|----------------------------|--------|-------------|--------|------------|--------|------------|--------|--------------|
|                            | Linear | Quadratic   | Linear | Quadratic  | Linear | Quadratic  | Linear | Quadratic    |
| Cortical GM                |        |             |        |            |        |            |        |              |
| Frontal GM                 | 1396   | <b>1345</b> | 730    | <b>681</b> | 353    | <b>306</b> | 405    | <b>349</b>   |
| Parietal GM                | 1419   | <b>1378</b> | 757    | <b>713</b> | 317    | <b>300</b> | 351    | <b>317</b>   |
| Temporal GM                | 1417   | <b>1374</b> | 746    | <b>700</b> | 292    | <b>270</b> | 316    | <b>291</b>   |
| Occipital GM               | 1422   | <b>1387</b> | 750    | <b>710</b> | 318    | <b>312</b> | 338    | <b>336</b>   |
| Insula                     | 1480   | <b>1436</b> | 933    | <b>897</b> | 294    | <b>290</b> | 353    | <b>303</b>   |
| WM                         |        |             |        |            |        |            |        |              |
| Frontal WM                 | 1127   | <b>1085</b> | 482    | <b>450</b> | 395    | <b>369</b> | 488    | <b>462</b>   |
| Parietal WM                | 1094   | <b>1060</b> | 442    | <b>422</b> | 360    | <b>341</b> | 453    | <b>435</b>   |
| Temporal WM                | 1140   | <b>1097</b> | 484    | <b>443</b> | 411    | <b>385</b> | 498    | <b>470</b>   |
| Occipital WM               | 1073   | <b>1050</b> | 408    | <b>396</b> | 345    | <b>327</b> | 439    | <b>421</b>   |
| Genu                       | 1088   | <b>1054</b> | 481    | <b>453</b> | 416    | <b>403</b> | 508    | <b>493</b>   |
| Splenium                   | 1069   | <b>1049</b> | 428    | <b>418</b> | 388    | <b>378</b> | 483    | <b>471</b>   |
| Internal Capsule           | 1109   | <b>1069</b> | 470    | <b>437</b> | 394    | <b>381</b> | 488    | <b>473</b>   |
| Middle Cerebellar Peduncle | 1085   | <b>1081</b> | 406    | <b>401</b> | 379    | <b>378</b> | 466.1  | <b>465.7</b> |
| Subcortical GM             |        |             |        |            |        |            |        |              |
| Caudate                    | 1206   | <b>1155</b> | 619    | <b>578</b> | 466    | <b>452</b> | 507    | <b>489</b>   |
| Putamen                    | 1157   | <b>1133</b> | 579    | <b>559</b> | 416    | <b>405</b> | 452    | <b>442</b>   |
| Thalamus                   | 1119   | <b>1100</b> | 483    | <b>446</b> | 387    | <b>385</b> | 468    | <b>466</b>   |

Abbreviations: GM, gray matter; WM, white matter. Note—The lower AIC value between linear and quadratic approximations are shown in bold type.

**Supplemental Digital Content 6.** (A) scatterplot of the ICV in relation to age along with a regression line. There is no significant correlation between ICV and age. (B) scatterplot of ICV in relation to BPV age along with a regression line. ICV and BPV have a strong positive correlation. ICV, intracranial volume; BPV, brain parenchymal volume

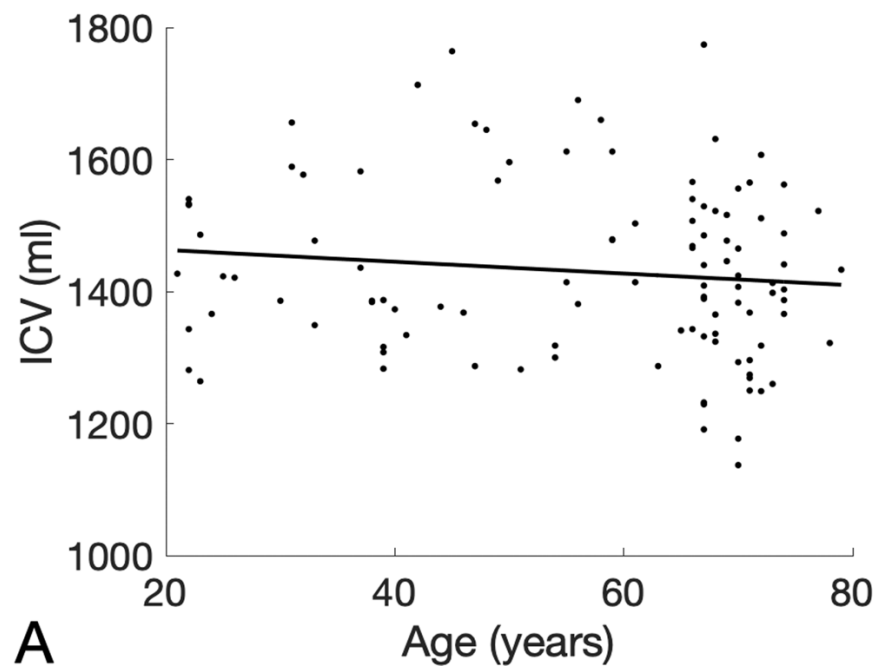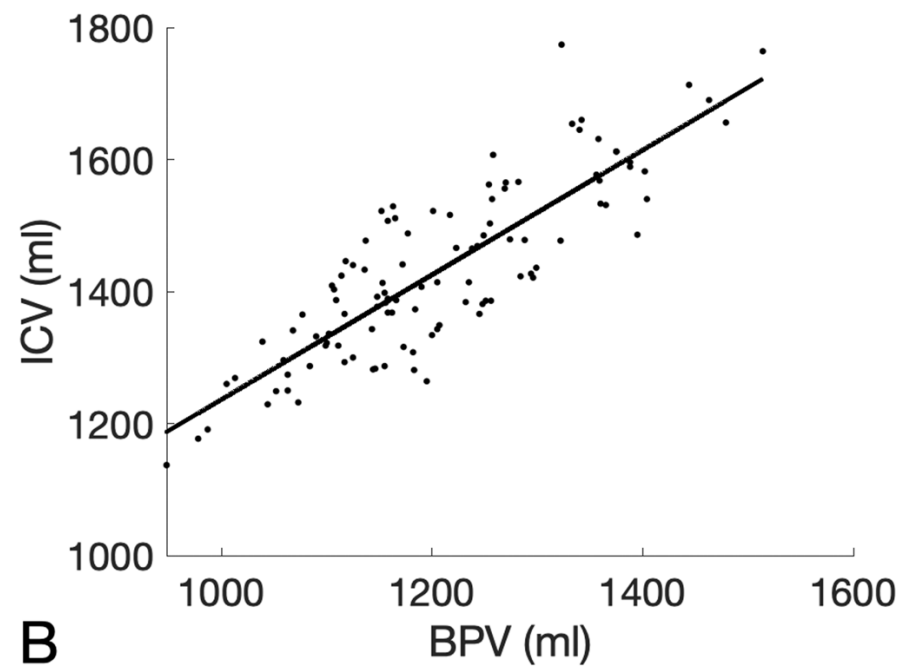

**Supplemental Digital Content 7.** The equations used to plot the curves for BPF, GMF, WMF, and MyF (%)

|        | Volume fractions                                               | SD of 1st coefficient | SD of 2nd coefficient | SD of 3rd coefficient | Adjusted R <sup>2</sup> (R <sup>2</sup> ) |
|--------|----------------------------------------------------------------|-----------------------|-----------------------|-----------------------|-------------------------------------------|
| BPF    |                                                                |                       |                       |                       |                                           |
| Male   | $-0.0022 \times \text{age}^2 - 0.020 \times \text{age} + 91.7$ | 0.0014                | 0.148                 | 3.4                   | 0.71 (0.72)                               |
| Female | $-0.0023 \times \text{age}^2 + 0.039 \times \text{age} + 91.1$ | 0.0010                | 0.105                 | 2.6                   | 0.73 (0.74)                               |
| GMF    |                                                                |                       |                       |                       |                                           |
| Male   | $0.0027 \times \text{age}^2 - 0.421 \times \text{age} + 61.2$  | 0.0012                | 0.125                 | 2.9                   | 0.56 (0.58)                               |
| Female | $0.0020 \times \text{age}^2 - 0.312 \times \text{age} + 59.2$  | 0.0009                | 0.098                 | 2.4                   | 0.47 (0.49)                               |
| WMF    |                                                                |                       |                       |                       |                                           |
| Male   | $-0.0048 \times \text{age}^2 + 0.386 \times \text{age} + 29.4$ | 0.0010                | 0.094                 | 2.3                   | 0.58 (0.59)                               |
| Female | $-0.0044 \times \text{age}^2 + 0.358 \times \text{age} + 30.9$ | 0.0009                | 0.095                 | 2.3                   | 0.57 (0.59)                               |
| MyF    |                                                                |                       |                       |                       |                                           |
| Male   | $-0.0017 \times \text{age}^2 + 0.133 \times \text{age} + 10.0$ | 0.0004                | 0.041                 | 1.0                   | 0.58 (0.60)                               |
| Female | $-0.0019 \times \text{age}^2 + 0.153 \times \text{age} + 9.5$  | 0.0003                | 0.037                 | 0.9                   | 0.60 (0.62)                               |

Abbreviations: BPF, brain parenchymal fraction; GMF, gray matter fraction; MyF; myelin fraction; SD; standard deviation; WMF, white matter fraction. Note—The 1st coefficient is for age<sup>2</sup>; the 2nd coefficient is for age; and the 3rd coefficient is the Y-intercept. The adjusted R<sup>2</sup> is a modified version of R<sup>2</sup> that has been adjusted for the number of independent variables in the model.

**Supplemental Digital Content 8.** The AIC of linear and quadratic approximations for BPF, GMV, WMF, and MyF

|        | <b>Linear</b> | <b>Quadratic</b> |
|--------|---------------|------------------|
| BPF    |               |                  |
| Male   | 263           | <b>261</b>       |
| Female | 279           | <b>273</b>       |
| GMF    |               |                  |
| Male   | 248           | <b>243</b>       |
| Female | 270           | <b>265</b>       |
| WMF    |               |                  |
| Male   | 239           | <b>217</b>       |
| Female | 283           | <b>261</b>       |
| MyF    |               |                  |
| Male   | 142           | <b>125</b>       |
| Female | 170           | <b>145</b>       |

Abbreviations: BPF, brain parenchymal fraction; GMF, gray matter fraction; MyF; myelin fraction; WMF, white matter fraction. Note—The lower AIC value between linear and quadratic approximations are shown in bold type.
